# Supplementary material for: Bioprosthesis in aortic valve replacement: long-term inflammatory response and functionality
Source: HighWire-hosted journal article supplement (doi:10.1136/openhrt-2022-002065), 2022-08-01

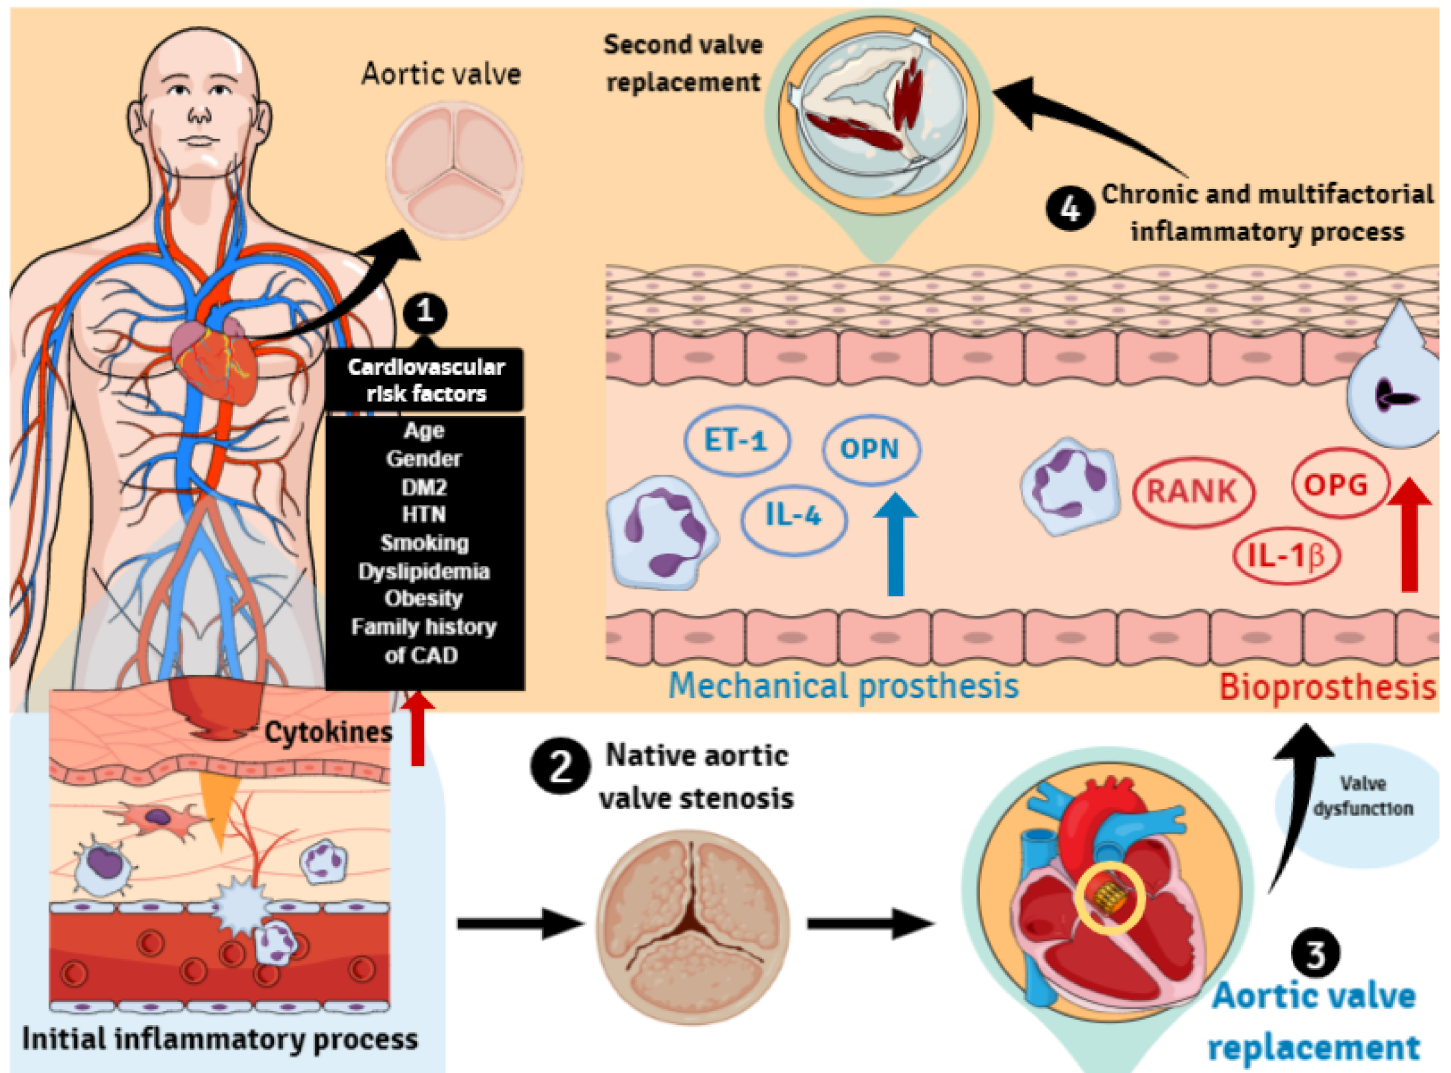

Supplement: openhrt-2022-002065supp001_data_supplement.pdf [file openhrt-2022-002065supp001_data_supplement.pdf]
